# Supplementary material
Source: ML conference proceedings conference paper supplement (https://openaccess.thecvf.com/content/WACV2022/html/Yucer_Measuring_Hidden_Bias_WACV_2022_paper.html)
Supplement: Supplementary file 1 [file Yucer_Measuring_Hidden_Bias_WACV_2022_supplemental.pdf]

# Measuring Hidden Bias within Face Recognition via Racial Phenotypes

## - Supplementary Material

Seyma Yucer<sup>1</sup>, Furkan Tektas<sup>3</sup>, Noura Al Moubayed<sup>1</sup> and Toby P. Breckon<sup>1,2</sup>  
Department of {Computer Science<sup>1</sup>, Engineering<sup>2</sup>}, Durham University, Durham, UK  
BuboAI<sup>3</sup>, Middlesbrough, UK

### 8. Supplementary Material

#### 8.1. Attribute-based Face Verification

We present attribute-based face verification scores including False Non-Match Rate (FNMR), False match rate (FMR) and F1 score in the Table S1. We use the same pairings and protocol [27] presented in the Section 6.2 for Table 3.

Whilst F1 scores are correlated with Table 3 accuracies, for the imbalanced training setup 1, the false matching ratio is higher on attributes like Monolid Eye, Type 6/5/4/3, Wide Nose, Full Lips than the different categories under the same attribute. Moreover, we observe that the balanced training setup 2 improves the FMR while increasing the FNMR for the attribute categories with higher accuracies and F1 scores.

| Attribute Name | Setup 1 |      |       | Setup 2 |      |      |
|----------------|---------|------|-------|---------|------|------|
|                | F1      | FNMR | FMR   | F1      | FNMR | FMR  |
| Blonde Hair    | 96.85   | 1.40 | 3.83  | 96.04   | 2.53 | 3.13 |
| Red Hair       | 96.60   | 2.83 | 4.00  | 96.48   | 2.83 | 2.83 |
| Type 2         | 95.98   | 3.10 | 3.90  | 95.25   | 3.77 | 3.90 |
| Bald           | 95.32   | 5.00 | 5.37  | 95.44   | 3.23 | 4.97 |
| Gray Hair      | 95.00   | 3.70 | 5.87  | 95.93   | 2.53 | 5.13 |
| Brown Hair     | 94.46   | 6.40 | 4.63  | 94.08   | 5.43 | 4.43 |
| Type 6         | 94.42   | 4.10 | 7.30  | 95.01   | 5.53 | 4.67 |
| Wavy Hair      | 93.96   | 3.27 | 7.53  | 95.42   | 4.97 | 3.77 |
| Narrow Nose    | 93.05   | 6.77 | 7.20  | 94.29   | 4.40 | 5.87 |
| Type 5         | 92.72   | 4.07 | 10.33 | 94.45   | 5.63 | 5.47 |
| Curly Hair     | 92.51   | 5.47 | 9.67  | 93.58   | 6.87 | 5.70 |
| Small Lips     | 92.36   | 5.80 | 8.37  | 94.29   | 5.03 | 4.70 |
| Type 1         | 92.08   | 5.99 | 6.45  | 90.14   | 6.67 | 9.41 |
| Type 3         | 91.80   | 8.63 | 7.73  | 93.59   | 5.93 | 6.13 |
| Straight Hair  | 91.19   | 9.17 | 6.87  | 93.97   | 4.30 | 6.53 |
| Other Eye      | 91.16   | 7.23 | 7.27  | 93.76   | 7.43 | 4.47 |
| Wide Nose      | 90.99   | 7.23 | 7.43  | 89.78   | 7.10 | 5.27 |
| Full Lips      | 90.73   | 6.60 | 10.17 | 93.43   | 7.13 | 5.77 |
| Type 4         | 90.45   | 8.30 | 8.53  | 93.50   | 5.70 | 6.93 |
| Black Hair     | 90.12   | 7.77 | 8.73  | 90.50   | 6.83 | 5.83 |
| Monolid Eye    | 88.84   | 9.53 | 13.03 | 90.62   | 8.47 | 6.93 |

Table S1. Attribute-based face verification F1, FNMR, TMR scores of RFW dataset on both training setups.
